# Supplementary material
Source: ML conference proceedings conference paper supplement (https://proceedings.neurips.cc/paper_files/paper/2023/hash/98c9b79e9c686aadd4d81e34a7773dd1-Abstract.html)
Supplement: Supplementary file 1 [file 98c9b79e9c686aadd4d81e34a7773dd1-Supplemental-Datasets_and_Benchmarks.zip]

Archive with 4 entries (4 files):
- datasheet.pdf
- DrunkardsDataset.mp4
- HamlynTrajectories.mp4
- supplementary.pdf
